# Supplementary material for: Erosion of rigid plastics in turbid (sandy) water: quantitative assessment for marine environments and formation of microplastics
Source: Royal Society of Chemistry journal article supplement (doi:10.1039/d4em00122b), 2024-01-01
Supplement: d4em00122b1.pdf [file d4em00122b1.pdf]

## Supplementary Information

### Erosion of plastics in turbid (sandy) water: Quantitative assessment for marine environments and formation of microplastics

Ali Al-Darraji <sup>1\*</sup>, Ibukun Oluwoye <sup>2, 4\*</sup>, Christopher Lagat <sup>3</sup>,

Shuhei Tanaka <sup>4</sup>, Ahmed Barifcani <sup>3</sup>

- 1) Discipline of Chemical Engineering, WA School of Mines: Minerals, Energy and Chemical Engineering, Curtin University, Western Australia, Australia
- 2) Curtin Corrosion Centre, Western Australian School of Mines: Minerals, Energy and Chemical Engineering, Curtin University, Perth, Australia.
- 3) Discipline of Petroleum Engineering, WA School of Mines: Minerals, Energy and Chemical Engineering, Curtin University, Western Australia, Australia
- 4) Graduate School of Global Environmental Studies, Kyoto University, Yoshida-Honmachi, Sakyo-ku, Kyoto, Japan.

**\* Corresponding authors**

Email: [Ibukun.Oluwoye@Curtin.edu.au](mailto:Ibukun.Oluwoye@Curtin.edu.au) ; [ali.al-darraji@curtin.edu.au](mailto:ali.al-darraji@curtin.edu.au)

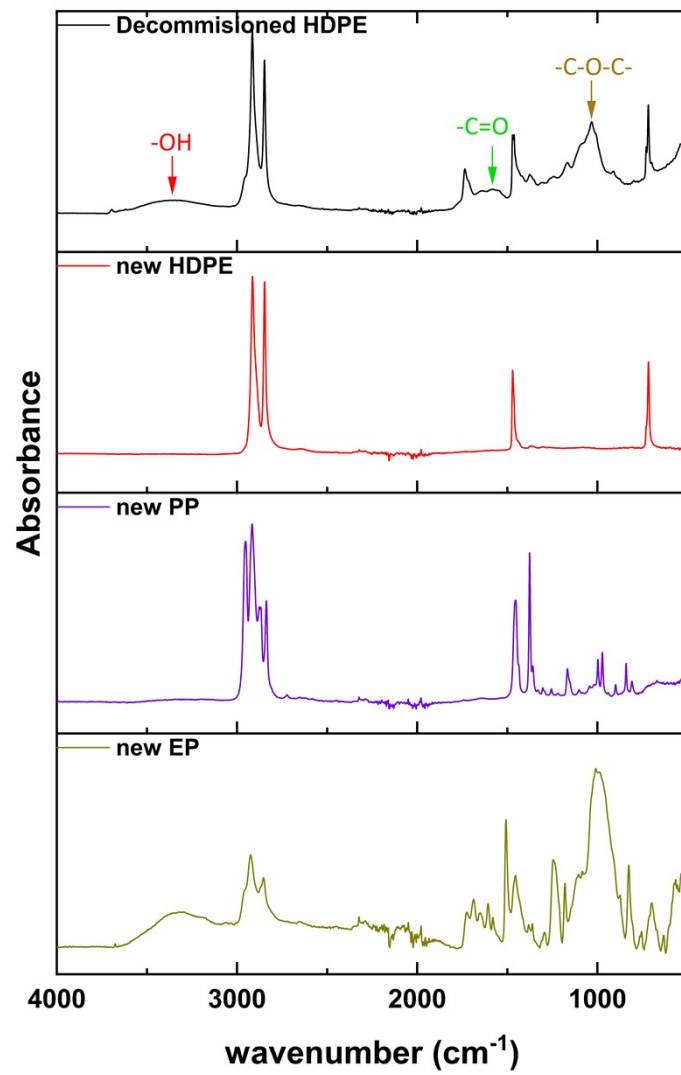

**Figure S1.** FTIR spectrum of the pristine synthetic polymers and selected decommissioned HDPE polymer specimens.

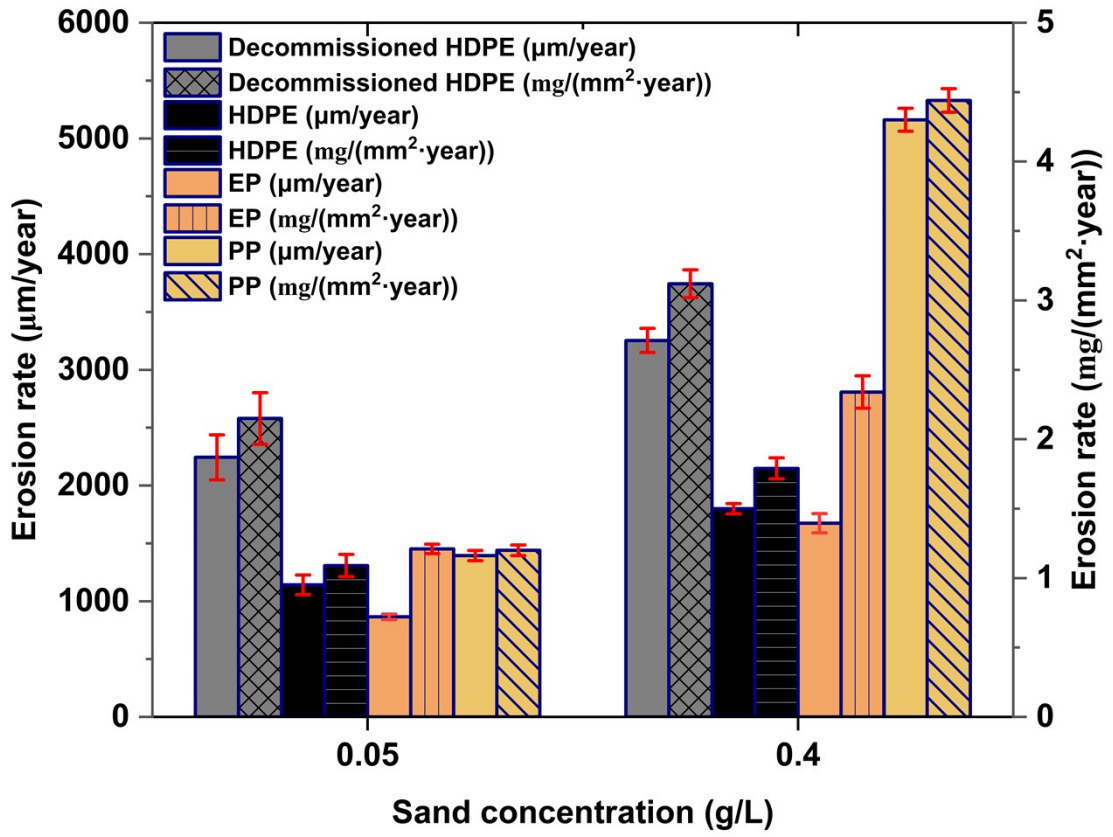

**Figure S2.** Experimentally measured erosion rates of the synthetic polymers (PP, HDPE, EP) and decommissioned HDPE

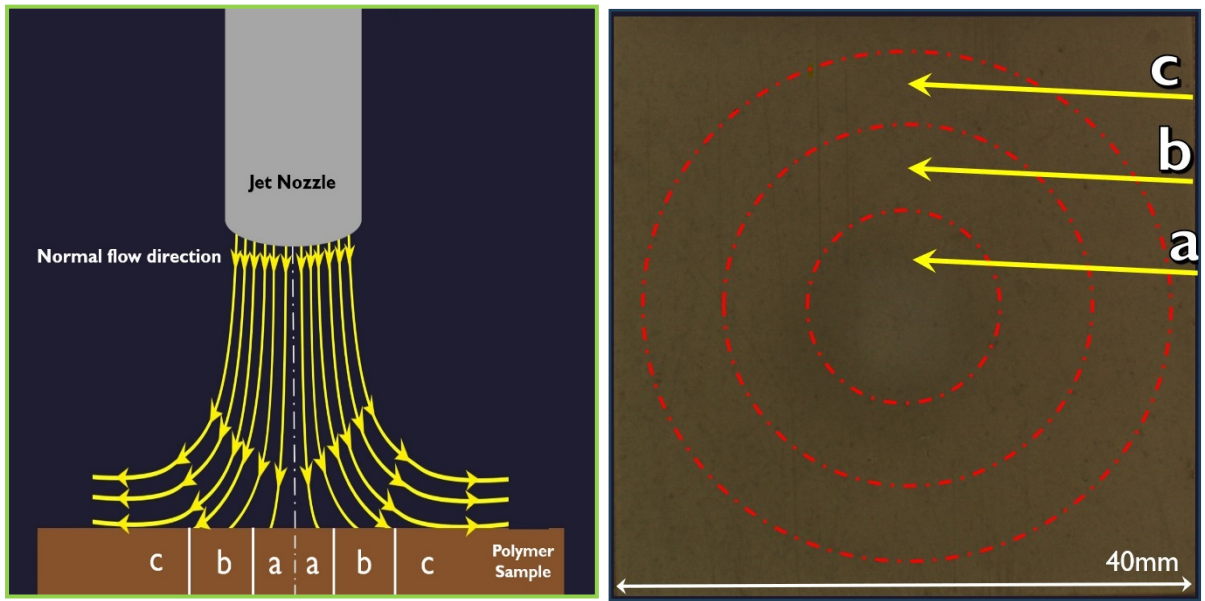

**Figure S3.** Flow trajectories while impacting a polymer sample at vertical angle (Left). Optical top view of an eroded surface of polymer sample showing the erosion zones.

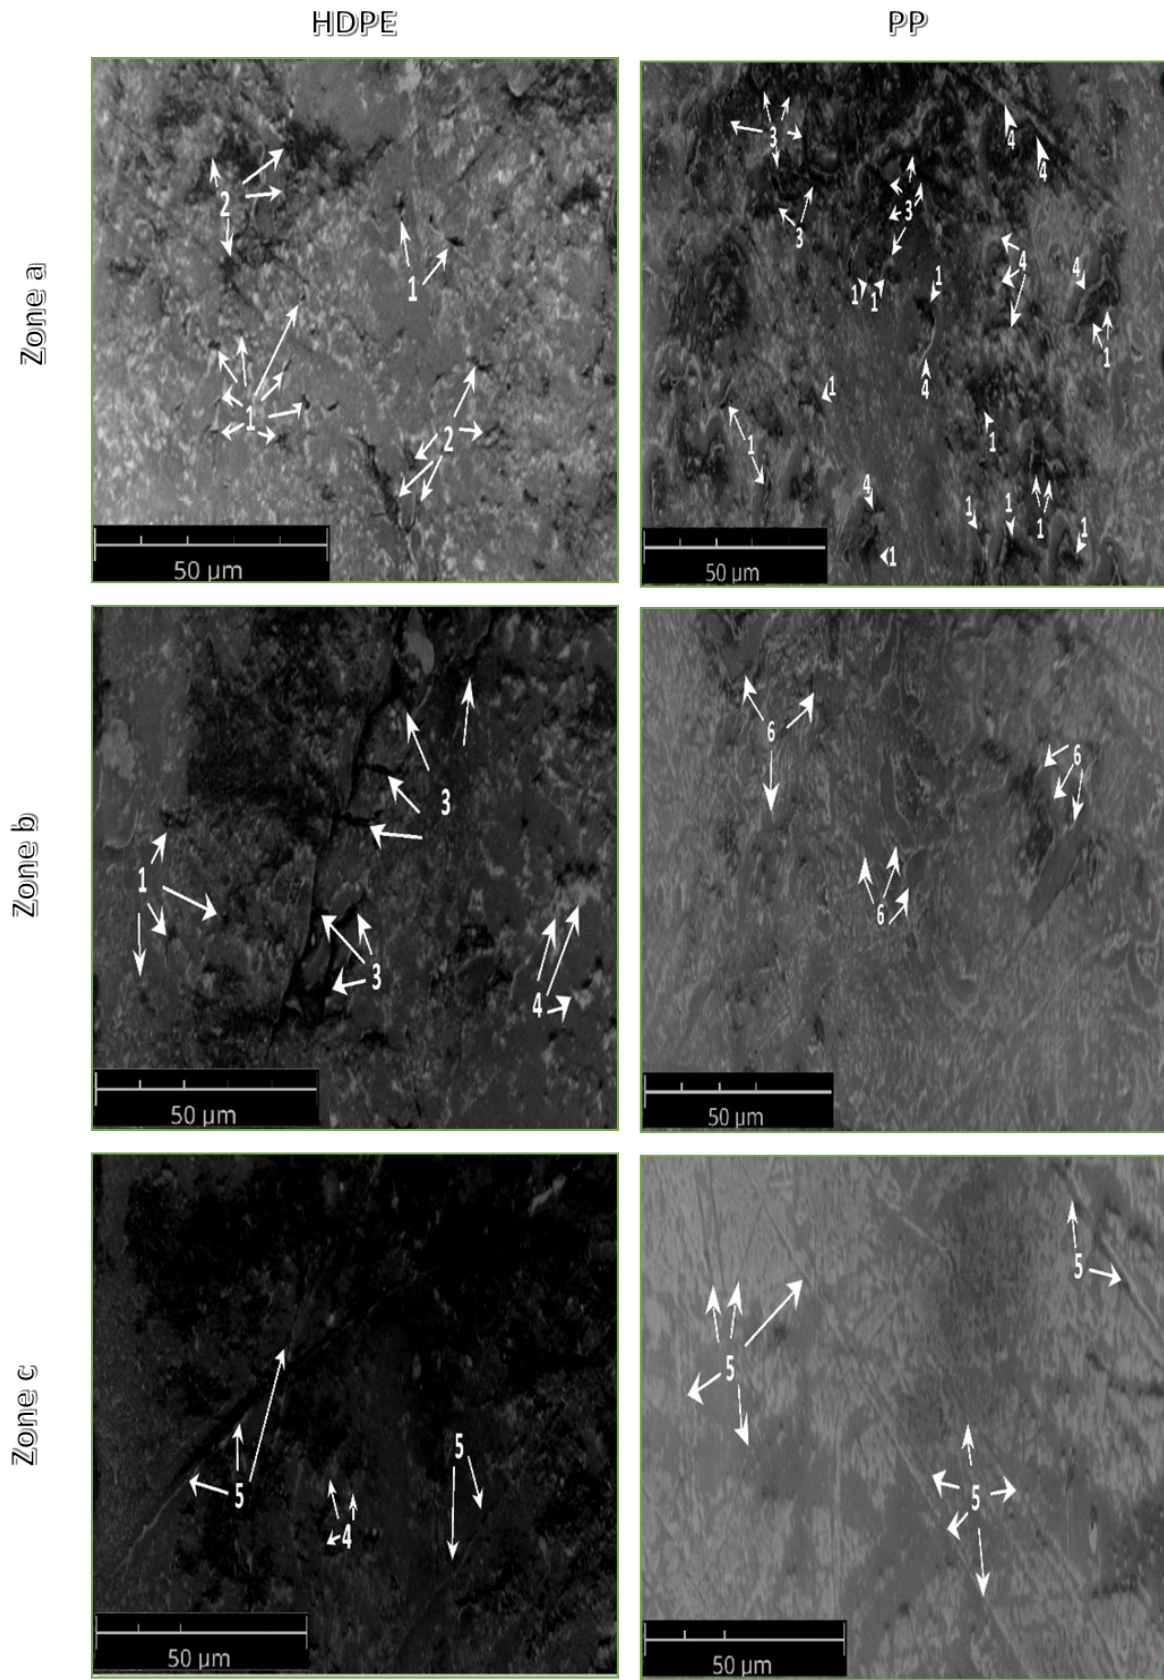

**Figure S4.** SEM images of high-density polyethylene and polypropylene.

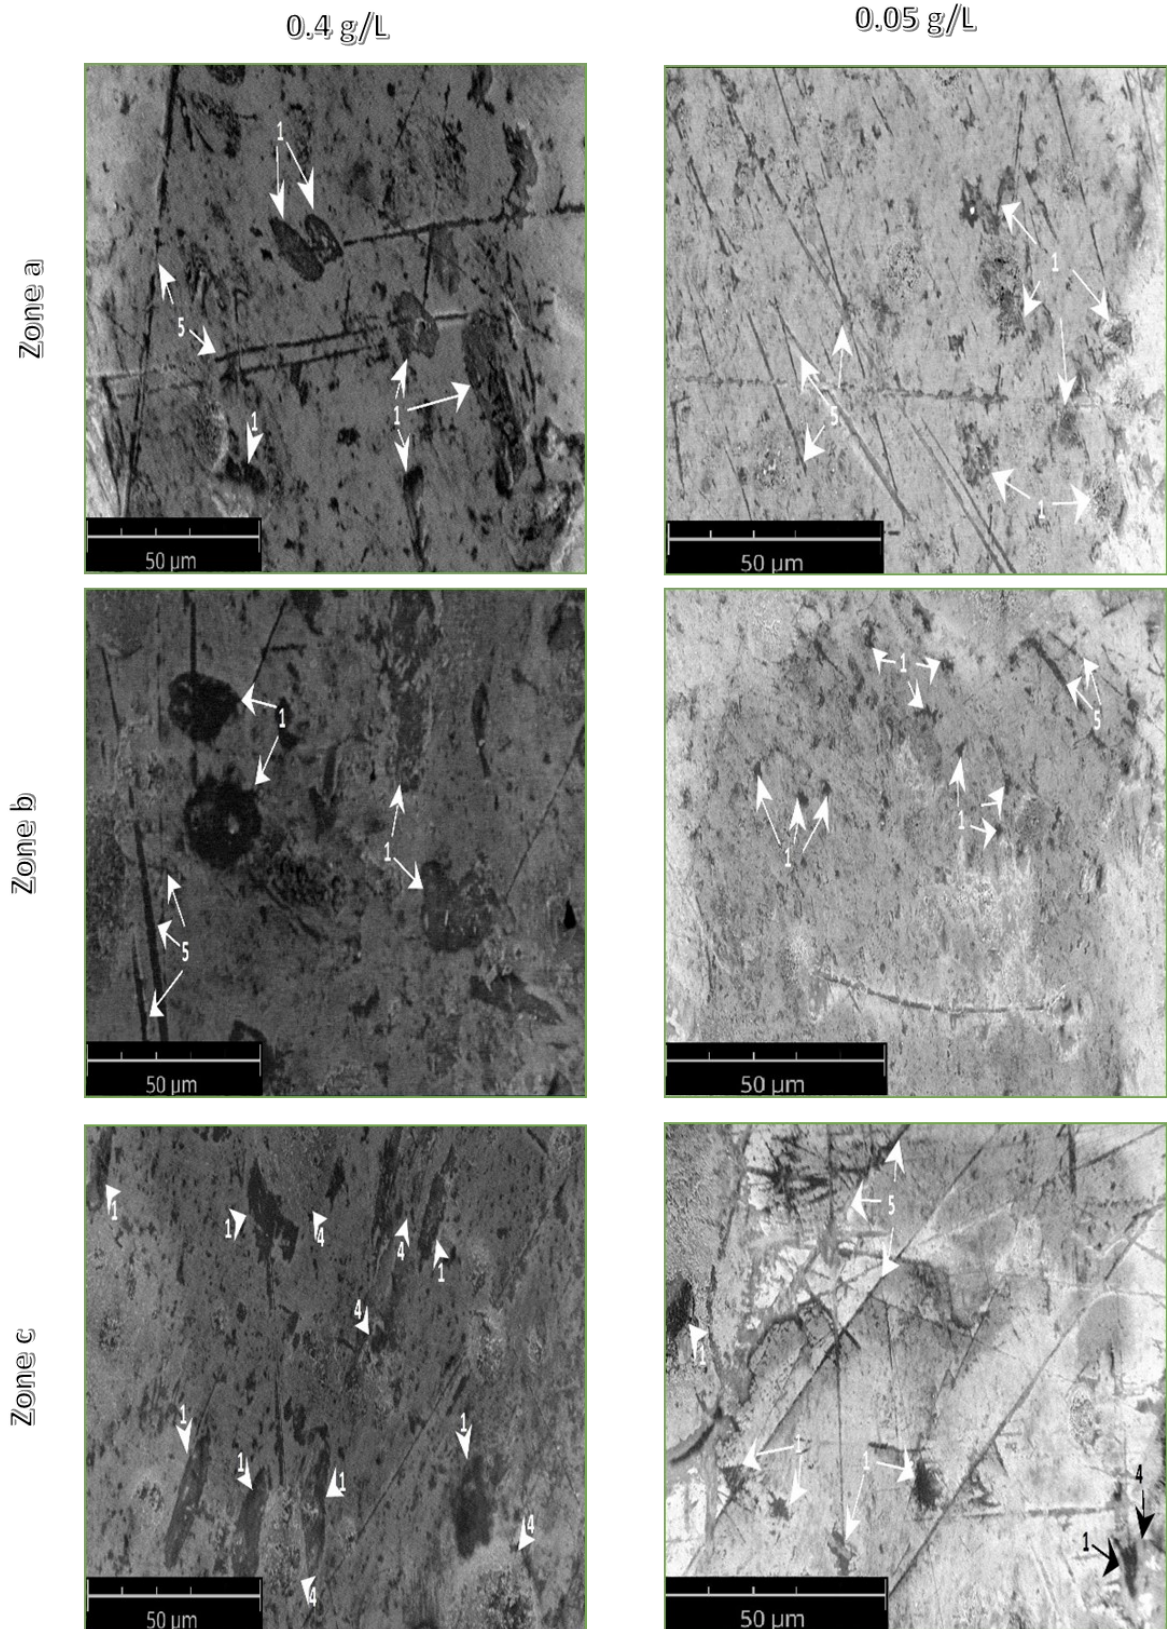

**Figure S5.** SEM images of high-build amine-cured epoxy thermoset (EP). Sand= 0.4 and 0.05 g/L, shape: Rounded + sub angular,  $V=2$  m/s, Angle=  $90^\circ$ . 1-craters, 2- micro-cracks, 3- interlinked cracks, 4-rims, 5- long scratches, 6- detached fragment.
